# Supplementary material for: Network vulnerability-based and knowledge-guided identification of microRNA biomarkers indicating platinum resistance in high-grade serous ovarian cancer
Source: Clin Transl Med. 2019 Oct 29;8:28. doi: 10.1186/s40169-019-0245-6 (PMC6820656; doi:10.1186/s40169-019-0245-6)
Supplement: Supplementary file 1 — Additional file 1. Differentially expressed miRNAs between platinum-resistant and platinum-sensitive HGSC patients. [file 40169_2019_245_MOESM1_ESM.xls]

## Sheet: Sheet1
Additional file 1. Differentially expressed miRNAs between platinum-resistant and platinum-sensitive HGSC patients
miRNA ID	Log2(FC)	P-value	Up/down-regulated
miR-3151	3.39	5.51e-05	Up
miR-135a-5p	2.22	0.002	Up
miR-1285-3p	1.8	0.037	Up
miR-542-5p	1.7	0.005	Up
miR-454-3p	1.5	0.023	Up
miR-365a-3p	1.48	0.003	Up
miR-128	1.32	0.022	Up
miR-181c-5p	1.31	0.015	Up
miR-146b-5p	1.26	0.019	Up
miR-10a-5p	1.22	0.017	Up
let-7c	1.19	0.006	Up
miR-483-3p	1.18	0.03	Up
miR-299-3p	1.16	0.025	Up
miR-146a-5p	1.13	0.026	Up
miR-708-5p	1.12	0.037	Up
miR-135b-5p	1.11	0.008	Up
miR-376c-3p	1.1	0.042	Up
miR-199a-3p	1.08	0.048	Up
miR-199b-3p	1.08	0.048	Up
miR-99b-5p	1.06	0.011	Up
miR-99a-5p	1.04	0.021	Up
miR-22-3p	1.01	0.041	Up
miR-409-5p	0.97	0.049	Up
miR-125b-5p	0.96	0.018	Up
miR-98-5p	0.93	0.017	Up
miR-382-5p	0.92	0.041	Up
miR-100-5p	0.89	0.026	Up
let-7e-5p	0.88	0.02	Up
let-7i-5p	0.81	0.029	Up
miR-183-5p	0.81	0.044	Up
miR-148a-3p	0.8	0.047	Up
miR-298	-1.26	0.045	Down
miR-623	-1.44	0.046	Down
miR-296-3p	-1.53	0.021	Down
miR-628-3p	-1.64	0.014	Down
miR-509-3p	-1.67	0.037	Down
miR-642b-3p	-1.76	0.021	Down
miR-509-3-5p	-1.94	0.017	Down
miR-513b	-2.52	0.016	Down
