# Supplementary material for: Network vulnerability-based and knowledge-guided identification of microRNA biomarkers indicating platinum resistance in high-grade serous ovarian cancer
Source: Clin Transl Med. 2019 Oct 29;8:28. doi: 10.1186/s40169-019-0245-6 (PMC6820656; doi:10.1186/s40169-019-0245-6)
Supplement: Supplementary file 3 — Additional file 3. The PRMNH composed by differentially expressed miRNAs and mRNAs. [file 40169_2019_245_MOESM3_ESM.xls]

## Sheet: Sheet1
Additional file 3. The PRMNH composed by differentially expressed miRNAs and mRNAs
miRNA ID	Gene ID
let-7c	SMCR8
let-7c	KIF5B
let-7c	HOMER1
let-7c	LRIG3
let-7e-5p	DUSP11
let-7e-5p	LRIG3
let-7i-5p	SOCS1
let-7i-5p	SMCR8
let-7i-5p	KIFC2
let-7i-5p	MAP4K3
let-7i-5p	SCYL2
miR-100-5p	BMPR2
miR-10a-5p	MTMR6
miR-10a-5p	MLLT10
miR-10a-5p	PJA2
miR-10a-5p	FNDC3A
miR-10a-5p	CSNK1G3
miR-10a-5p	NSL1
miR-10a-5p	KLF4
miR-10a-5p	GNG12
miR-125b-5p	DUS1L
miR-125b-5p	MUC1
miR-128	BMI1
miR-135a-5p	MOV10
miR-135a-5p	TRIM23
miR-135a-5p	CAP2
miR-135a-5p	NR3C2
miR-135a-5p	POLK
miR-135b-5p	MOV10
miR-135b-5p	BGLAP
miR-135b-5p	TRIM23
miR-135b-5p	CAP2
miR-135b-5p	NR3C2
miR-135b-5p	KLF4
miR-135b-5p	POLK
miR-146a-5p	COL13A1
miR-146a-5p	BGLAP
miR-146a-5p	SESN3
miR-146a-5p	SDCBP2
miR-146a-5p	TSPAN18
miR-146a-5p	HSPA1A
miR-146a-5p	RAD54L
miR-146b-5p	PLAGL1
miR-146b-5p	SESN3
miR-146b-5p	TSPAN18
miR-146b-5p	HSPA1A
miR-148a-3p	CYB5R4
miR-148a-3p	MLLT10
miR-148a-3p	KLF4
miR-148a-3p	RPS6KA5
miR-148a-3p	TMED7
miR-181c-5p	LMBRD2
miR-181c-5p	FNDC3A
miR-181c-5p	BMPR2
miR-181c-5p	BCL11A
miR-181c-5p	GSTCD
miR-181c-5p	CXCL2
miR-183-5p	FRMD6
miR-183-5p	ITGB1
miR-183-5p	SEC24A
miR-183-5p	PAM
miR-183-5p	TMEM14A
miR-183-5p	ATP13A3
miR-199a-3p	ABCA1
miR-199a-3p	PLEKHA3
miR-22-3p	TRUB1
miR-22-3p	MAP3K6
miR-22-3p	NDFIP2
miR-22-3p	TAP1
miR-22-3p	RAB5B
miR-22-3p	CLIC4
miR-296-3p	MT2A
miR-296-3p	FOSL1
miR-296-3p	TNPO1
miR-299-3p	TCF4
miR-365a-3p	CHIC1
miR-365a-3p	ZNF254
miR-365a-3p	FAM3C
miR-365a-3p	IMPA1
miR-365a-3p	FAM60A
miR-376c-3p	HIF1A
miR-376c-3p	PRDX3
miR-376c-3p	GTF2H3
miR-376c-3p	PANK3
miR-376c-3p	MAP4K3
miR-382-5p	GATA2
miR-454-3p	GMFB
miR-454-3p	MTMR6
miR-454-3p	CYB5R4
miR-454-3p	ABCA1
miR-454-3p	MLLT10
miR-454-3p	PPARG
miR-454-3p	FBXO28
miR-454-3p	UBE2D1
miR-454-3p	IL1RAP
miR-454-3p	PFKFB3
miR-454-3p	CNTNAP3B
miR-454-3p	SPG20
miR-454-3p	THAP1
miR-454-3p	FKBP11
miR-454-3p	PTPRG
miR-454-3p	AKAP11
miR-454-3p	ENAH
miR-454-3p	NR3C2
miR-454-3p	ENPP4
miR-454-3p	ENPP5
miR-454-3p	PHTF2
miR-454-3p	IRF1
miR-454-3p	ERCC8
miR-454-3p	GJA1
miR-454-3p	KIAA1462
miR-454-3p	FNDC3A
miR-454-3p	MAP1B
miR-454-3p	ZNF148
miR-454-3p	HOXC8
miR-454-3p	FZD6
miR-454-3p	NFATC3
miR-454-3p	KIAA1033
miR-454-3p	EXOC5
miR-454-3p	FANCA
miR-454-3p	BMPR2
miR-454-3p	PIK3C2A
miR-454-3p	DUSP11
miR-454-3p	TNPO1
miR-454-3p	PANK3
miR-454-3p	RPS6KA5
miR-454-3p	ACSL4
miR-454-3p	TWF1
miR-454-3p	BCL11A
miR-454-3p	CLIC4
miR-454-3p	TMED7
miR-454-3p	HEG1
miR-454-3p	SUZ12
miR-454-3p	POSTN
miR-454-3p	SMAD5
miR-454-3p	ACBD3
miR-454-3p	TGFBR2
miR-454-3p	RASA1
miR-454-3p	CDH13
miR-454-3p	ATP13A3
miR-483-3p	ITGA7
miR-483-3p	CDR2L
miR-483-3p	KIF26B
miR-483-3p	NFATC3
miR-483-3p	TNXB
miR-628-3p	CD38
miR-628-3p	SGPP1
miR-708-5p	TMEM88
miR-708-5p	BMI1
miR-708-5p	CD38
miR-708-5p	ENAH
miR-708-5p	CRIM1
miR-708-5p	TAP1
miR-708-5p	GNG12
miR-708-5p	RAD54L
miR-98-5p	DPYSL3
miR-98-5p	MLLT10
miR-98-5p	EEA1
miR-98-5p	SNX16
miR-98-5p	LGR4
miR-98-5p	SOCS1
miR-98-5p	ARL5A
miR-98-5p	IMPAD1
miR-98-5p	PTPRG
miR-98-5p	CCR7
miR-98-5p	RAG1
miR-98-5p	FBN1
miR-98-5p	TAF1A
miR-98-5p	GALC
miR-98-5p	RB1
miR-98-5p	XYLT1
miR-98-5p	MBNL2
miR-98-5p	FNDC3A
miR-98-5p	HOXC8
miR-98-5p	HOMER1
miR-98-5p	TEAD1
miR-98-5p	KIFC2
miR-98-5p	EXOC5
miR-98-5p	USP6
miR-98-5p	ANKRD46
miR-98-5p	ADAM9
miR-98-5p	CPE
miR-98-5p	ACSL4
miR-98-5p	GABPA
miR-98-5p	VGLL3
miR-98-5p	MAP4K3
miR-98-5p	COL4A5
miR-98-5p	ARHGAP28
miR-98-5p	CMTM6
